# Supplementary material for: Synthesis of methyl propanoate by Baeyer–Villiger monooxygenases
Source: Royal Society of Chemistry journal article supplement (doi:10.1039/c4cc06489e), 2014-09-09
Supplement: c4cc06489e2.xlsx [file c4cc06489e2.xlsx]

## Sheet: Sheet1
Abbreviation	Name	Source	Accession number	GI number	Sequence	Abbreviations	CRE2-vector	expression temperature	[]but (mM)	[]etac (mM)	[]mepr (mM)	Conv (%)	stdev (%)	% mepr	stdev (%)
>PAMO	Phenylacetone monooxygenase	Thermobifida fusca YX	YP_289549.1	GI:72161892	MAGQTTVDSRRQPPEEVDVLVVGAGFSGLYALYRLRELGRSVHVIETAGDVGGVWYWNRYPGARCDIESIEYCYSFSEEVLQEWNWTERYASQPEILRYINFVADKFDLRSGITFHTTVTAAAFDEATNTWTVDTNHGDRIRARYLIMASGQLSVPQLPNFPGLKDFAGNLYHTGNWPHEPVDFSGQRVGVIGTGSSGIQVSPQIAKQAAELFVFQRTPHFAVPARNAPLDPEFLADLKKRYAEFREESRNTPGGTHRYQGPKSALEVSDEELVETLERYWQEGGPDILAAYRDILRDRDANERVAEFIRNKIRNTVRDPEVAERLVPKGYPFGTKRLILEIDYYEMFNRDNVHLVDTLSAPIETITPRGVRTSEREYELDSLVLATGFDALTGALFKI…	.	Y	37	3.815	0.0209953		0.547323
>CPMO	Cyclopentanone monooxygenase	Comamonas sp. NCIMB 9872	Q8GAW0.3	GI:62286566	MTTMTTMTTEQLGMNNSVNDKLDVLLIGAGFTGLYQLYHLRKLGYKVHLVDAGADIGGIWHWNCYPGARVDTHCQIYQYSIPELWQEFNWKELFPNWAQMREYFHFADKKLDLSKDISFNTRVQSAVFDEGTREWTVRSIGHQPIQARFVIANLGFGASPSTPNVDGIETFKGQWYHTALWPQEGVNMAGKRVAIIGTGSSGVQVAQEAALDAKQVTVYQRTPNLALPMHQKQLSAEDNLRMKPELPAAFERRGKCFAGFDFDFIAKNATELSAAERTEILEELWNAGGFRYWLANFQDYLFDDKANDYVYEFWRDKVRARIKDPKVAEKLAPMKKPHPYGAKRPSLEQWYYEIFNQNNVTLVDVNETPVLRITEKGIVTAEGEAEFDLIVFATGFDAV…	CRE2-CPMO	Y	24				100	no detectable substrate
>CHMO Ac	Cyclohexanone monooxygenase	Acinetobacter sp.	P12015.2	GI:118066	MSQKMDFDAIVIGGGFGGLYAVKKLRDELELKVQAFDKATDVAGTWYWNRYPGALSDTETHLYCYSWDKELLQSLEIKKKYVQGPDVRKYLQQVAEKHDLKKSYQFNTAVQSAHYNEADALWEVTTEYGDKYTARFLITALGLLSAPNLPNIKGINQFKGELHHTSRWPDDVSFEGKRVGVIGTGSTGVQVITAVAPLAKHLTVFQRSAQYSVPIGNDPLSEEDVKKIKDNYDKIWDGVWNSALAFGLNESTVPAMSVSAEERKAVFEKAWQTGGGFRFMFETFGDIATNMEANIEAQNFIKGKIAEIVKDPAIAQKLMPQDLYAKRPLCDSGYYNTFNRDNVRLEDVKANPIVEITENGVKLENGDFVELDMLICATGFDAVDGNYVRMDIQGKNGLA…	CRE2-CHMO Acinetobacter	Y	24	2.84764	1.72152	0.601337	44.9099	0.75419	25.8857	0.0714907
>HAPMO	4-Hydroxyacetophenone monooxygenase	Pseudomonas fluorescens	Q93TJ5.1	GI:81323995	MSAFNTTLPSLDYDDDTLREHLQGADIPTLLLTVAHLTGDLQILKPNWKPSIAMGVARSGMDLETEAQVREFCLQRLIDFRDSGQPAPGRPTSDQLHILGTWLMGPVIEPYLPLIAEEAVTAEEDLRAPRWHKDHVASGRDFKVVIIGAGESGMIAALRFKQAGVPFVIYEKGNDVGGTWRENTYPGCRVDINSFWYSFSFARGIWDDCFAPAPQVFAYMQAVAREHGLYEHIRFNTEVSDAHWDESTQRWQLLYRDSEGQTQVDSNVVVFAVGQLNRPMIPAIPGIETFKGPMFHSAQWDHDVDWSGKRVGVIGTGASATQFIPQLAQTAAELKVFARTTNWLLPTPDLHEKISDSCKWLLAHVPHYSLWYRVAMAMPQSVGFLEDVMVDVGYPPTEL…	.	Y	17	2.15845	0.176456		7.55731
>EtaA	Ethionamide monooxygenase	Mycobacterium bovis AF2122/97	Q7TVI2.1	GI:81421191	MTEHLDVVIVGAGISGVSAAWHLQDRCPTKSYAILEKRESMGGTWDLFRYPGIRSDSDMYTLGFRFRPWTGRQAIADGKPILEYVKSTAAMYGIDRHIRFHHKVISADWSTAENRWTVHIQSHGTLSALTCEFLFLCSGYYNYDEGYSPRFAGSEDFVGPIIHPQHWPEDLDYDAKNIVVIGSGATAVTLVPALADSGAKHVTMLQRSPTYIVSQPDRDGIAEKLNRWLPETMAYTAVRWKNVLRQAAVYSACQKWPRRMRKMFLSLIQRQLPEGYDVRKHFGPHYNPWDQRLCLVPNGDLFRAIRHGKVEVVTDTIERFTATGIRLNSGRELPADIIITATGLNLQLFGGATATIDGQQVDITTTMAYKGMMLSGIPNMAYTVGYTNASWTLKADLVS…	CRE2-HAPMO	Y	24	4.61795	0.587687		11.2898	0.221754
>CPDMO	Cyclopentadecanone monooxygenase	Pseudomonas sp. HI-70	BAN84077.1	GI:544185633	MSQLIQEPAEAGVTSQKVSFDHVALREKYRQERDKRLRQDGQEQYLEVAVTCDEYLKDPYADPIVRDPVVRETDVFIIGGGFGGLLAAVRLQQAGVSDYVMVERAGDYGGTWYWNRYPGAQCDIESYVYMPLLEEMGYIPTEKYAFGTEILEYSRSIGRKFGLYERTYFQTEVKDLSWDDEAARWRITTDRGDKFSARFVCMSTGPLQRPKLPGIPGITSFKGHSFHTSRWDYSYTGGDQTGNLEGLKDKRVAIIGTGATSIQAVPHLAAYAQELYVIQRTPISVGFRGNKPTDPEWAKSLQPGWQQARMDNFNAITHGMPVDVDLVQDSWTKIFGEIGVFLGSDGSRAQMVDFQLMEQIRARVDQEVKDPATAESLKPYYNIMCKRPGFHDSYLPSFN…	CRE2-CPDMO	Y	24	2.67097	1.44426	0.496558	42.0448	3.31676	25.4847	1.95956
>STMO	Steroid Monooxygenase	Rhodococcus rhodochrous	4AOS_A	GI:388604094	MNGQHPRSVVTAPDATTGTTSYDVVVVGAGIAGLYAIHRFRSQGLTVRAFEAASGVGGVWYWNRYPGARCDVESIDYSYSFSPELEQEWNWSEKYATQPEILAYLEHVADRFDLRRDIRFDTRVTSAVLDEEGLRWTVRTDRGDEVSARFLVVAAGPLSNANTPAFDGLDRFTGDIVHTARWPHDGVDFTGKRVGVIGTGSSGIQSIPIIAEQAEQLFVFQRSANYSIPAGNVPLDDATRAEQKANYAERRRLSRESGGGSPHRPHPKSALEVSEEERRAVYEERWKLGGVLFSKAFPDQLTDPAANDTARAFWEEKIRAVVDDPAVAELLTPKDHAIGAKRIVTDSGYYETYNRDNVELVDLRSTPIVGMDETGIVTTGAHYDLDMIVLATGFDAMTG…	.	Y	24	4.00283	0.0121447		0.302486
>ACMO	Acetone monooxygenase	Gordonia sp. TY-5	BAF43791.1	GI:121309116	MSTTTLDAAVIGTGVAGLYELHMLREQGLEVRAYDKASGVGGTWYWNRYPGARFDSEAYIYQYLFDEDLYKGWSWSQRFPGQEEIERWLNYVADSLDLRRDISLETEITSAVFDEDRNRWTLTTADGDTIDAQFLITCCGMLSAPMKDLFPGQSDFGGQLVHTARWPKEGIDFAGKRVGVIGNGATGIQVIQSIAADVDELKVFIRTPQYALPMKNPSYGPDEVAWYKSRFGELKDTLPHTFTGFEYDFTDAWEDLTPEQRRARLEDDYENGSLKLWLASFAEIFSDEQVSEEVSEFVREKMRARLVDPELCDLLIPSDYGFGTHRVPLETNYLEVYHRDNVTAVLVRDNPITRIRENGIELADGTVHELDVIIMATGFDAGTGALTRIDIRGRDGRTL…	CRE2-AcMO Gordonia sp.	Y	24	3.55376	1.64461		31.5361	2.19671
>CHMO Rh	Cyclohexanone monooxygenase	Rhodococcus sp. HI-31	3GWD_A	GI:229597911	MTAQTTHTVDAVVIGAGFGGIYAVHKLHHELGLTTVGFDKADGPGGTWYWNRYPGALSDTESHLYRFSFDRDLLQESTWKTTYITQPEILEYLEDVVDRFDLRRHFKFGTEVTSALYLDDENLWEVTTDHGEVYRAKYVVNAVGLLSAINFPNLPGLDTFEGETIHTAAWPEGKSLAGRRVGVIGTGSTGQQVITSLAPEVEHLTVFVRTPQYSVPVGNRPVNPEQIAEIKADYDRIWERAKNSAVAFGFEESTLPAMSVSEEERNRIFQEAWDHGGGFRFMFGTFGDIATDEAANEAAASFIRAKVAEIIEDPETARKLMPKGLFAKRPLCDSGYYEVYNRPNVEAVAIKENPIREVTAKGVVTEDGVLHELDVLVFATGFDAVDGNYRRIEIRGRDG…	CRE2-CHMO Rhodococcus HI-31	Y	17	2.60039	2.31145	0.348032	48.7813	2.79632	13.7093	2.26097
>BVMO Ht	Baeyer-Villiger monooxygenase	Haloterrigena turkmenica DSM 5511	YP_003405371.1	GI:284167093	MQLSSDKRAADAAQTGDTDVDAVVVGAGFSGLYMLHRLRDELGLSVKVIEKADDVGGTWYWNKYPGARCDSRSWFYCFSFDEEIRDEWQYSEKFPEQPEILEYQRFVADRLDLRRDIEFNTEVTSAAFDENAGVWNVETDDGSTISSQFFVPAVGNLSKPYLPDFDGLESFGGEWYHTAKWPEEGVDLSGKRVGLVGTGSTGIQIMPRLAERSEHLTVFQRTPNYGVPARNEPLTDEEWEEIRENYEEMWEEAHASDAGLGFDTEFDSIDEASEEEIDRALEEGWENGAQGLLNVFTDVMVNEESNERVAEFIRSKIREIVDDPEVAEKLVPTDHPYGAKRPPLTYDGYYEKYNRDDVELVDVGESPIERIETDGIRTGDSVHDLDIIVFATGFDAVTG…	.	Y	17	3.96587			0.19
>BVMO Te	Baeyer-Villiger monooxygenase	Trichodesmium erythraeum IMS101	YP_723341.1	GI:113477280	MQLNNQISSNPDQNLEIAIIGAGISGLCMAINLRKAGITTFKIFEKSDNVGGTWHDNTYPSCGCDTPSILYSFSFEPKSDWTRHFPKQPEILEYLEHCSKKYDIRKHITFNTEISSAFFDSEKNIWRIYSASGEEFSANILVSGCGQLNKPKIPHLDGLETFSGTQFHCARWNHEHDLKDETVAVIGTGASAIQFIPIIAEQVKKLIVFQRSAPWIAPKPDFKFTNFIHWLGKSFPFILRFYRWLLYLVLEYFVVYLTIKQNTIVGKLVSTFLNFQREKIIKDENLKSILKPNYEVGCKRILISNDYYPALQLPNVEVVAQDIKGINQNQIITKEGREYPVDTLIFATGFDTKLLSSIKIVGLNNQLLQDKWQDGAEAYKGIMIPEFPNLFMLYGPNTN…	.	Y	17	4.04817	0.00516972		2
>MekA	Methyl ketone monooxygenase	Pseudomonas veronii	ABI15711.1	GI:112361340	MQLSAQSKLAAGSCAYGNVTSLDAMVIGAGVAGLYQLYRLREMGLTVRAYDTASGVGGTWYWNRYPGARFDSQAEIYQYWFSEELYKSWQPTERFPAQPETEEWLNFVANRLNLKKDIQFNTRIASAHFCEDSGRWVVTTAAGETINTQYLISCCGMLSAPLSDRFPGQADFQGQIYHTGLWPKDPVDFNGKRVAVVGTGATGIQVIQTIAPTVGSMTVFVRTPQYVIPMRNPKYSKADWEKWGTQFHQLKKRVRETFAGFDYDFDAGPWAEKTPDERQAVLEQLWKDGSLAMWLASFPEMFFDEQVNEVVSQFVRIKMRERLRSRPDLCDLLIPTDYGFGTHRVPLENNYLEVYLQSNVKAVDCKQSPIERIVPQGIQTADGKIHEVDIIVLAVGFDA…	CRE2-MekA	Y	17	2.70527	2.29758		46.0987	4.00901
>AlmA	Baeyer-Villiger monooxygenase	Acinetobacter venetianus	WP_004877609.1	GI:491015902	MQLEKQVDVLIIGAGISGIGLAVHLSKNCPQRKFEILERRESFGGTWDLFRYPGIRSDSDMSTFGFNFKPWAKDKVLASGAEIKGYLSDVISENQLKDKIHFGHRVLSANYDSTKKKWLVEIEDNNKKKQTWSANFVMGCTGYYNYDQGYAPKFPKQEDFKGQFIHPQHWPENLDYTGKKVVIIGSGATAITLVPSMVKGGAGHVTMLQRSPTYIATIPSIDFIYEKTRKFMSEETAYKFTRARNIGMQRGIYALAQKYPKTVRRLLLKGIELQLKGKVDMKHFTPSYNPWDQRLCVVPDGDLFKALREGQASVETDQIEKFTANGIQLKSGKHLEADIVISATGLEIQILGGVQGSIDGKPMNTSQHMLYQGVMVSDVPNMAMIIGYINASWTLKVDI…	CRE2-AlmA Acinetobacter	Y	17	4.49345	0.239823		5.03422	1.02272
>CHMO Bp	Cyclohexanone monooxygenase	Brachymonas petroleovorans	AAR99068.1	GI:41058922	MQLSSSPSSAIHFDAIVVGAGFGGMYMLHKLRDQLGLKVKVFDTAGGIGGTWYWNRYPGALSDTHSHVYQYSFDEAMLQEWTWKNKYLTQPEILAYLEYVADRLDLRPDIQLNTTVTSMHFNEVHNIWEVRTDRGGYYTARFIVTALGLLSAINWPNIPGRESFQGEMYHTAAWPKDVELRGKRVGVIGTGSTGVQLITAIAPEVKHLTVFQRTPQYSVPTGNRPVSAQEIAEVKRNFSKVWQQVRESAVAFGFEESTVPAMSVSEAERQRVFQEAWNQGNGFYYMFGTFCDIATDPQANEAAATFIRNKIAEIVKDPETARKLTPTDVYARRPLCDSGYYRTYNRSNVSLVDVKATPISAMTPRGIRTADGVEHELDMLILATGYDAVDGNYRRIDLR…	CRE2-CHMO Brachymonas petroleovorans	Y	17	4.16409	0.494453	0.198515	14.4059	3.05792	27.0581	3.10106
>CHMO Xf	Cyclohexanone monooxygenase	Xanthobacter flavus	CAD10801.1	GI:18495818	MQLTMTVEKTRTGGADYDAVVVGAGFGGLYAVHKLRNEQGMNVKAYDNAADIGGTWFWNRYPGAVSDTESFVYRFSFDRELLQRGRWKNRYVTQPEILAYLNEVADHLDLRRSYEFNTKVSAAQFDDATGLWKVTTDKGQAVTAKYLITGLGLLSATNLPKFKGMDTFKGRILHTGAWPEGVELAGKRVGIIGTGSTGVQVITATAPIAKHLTVFQRSAQFVVPIGNTPQDAETIARQKATYDDIWKQVKSSAVAFGFEESTIPAETASPEERDRVFEAAWQRGGGFYFMFGTFSDIATSQVANDAAADFIKRKLKQIVKDPETARKLTPSDLYAKRPLCGDDYYGVYNRDNVTLADVKADPIAEFTLTGIRLASGAEHELDVVIFATGFDAVDGNYTR…	CRE2-CHMO Xanthobacter flavus	Y	17	2.9903	1.47736	0.615427	41.3976	2.66902	26.1332	6.15017
>BVMO1	Baeyer-Villiger monooxygenase	Rhodococcus jostii RHA1	ro06679		STAAPAVTEVLDVLVVGAGFAGLYQLENLRSRGYSVKVVEAGEGLGGIWHWNRYPGARVDSEGPIYQFTRPDLWDEFAFSELYPGGDELRRYFKYVDAKLDLSKDIYYNTRIISAEFDDTANTWTVTAENGSSFVCKYFVLCTGFAAKPIFPKLPGMDSFTGINHHTGLWPEGGIEFAGKRIAIIGTGASGVQVAQEASKKAAQLTVFQRTPVQALPMRQRQLTDEDNAKIKFDLADRFSRRSASFSGFDFDFIPKSALGVSDEERITTYERLWECGFEFWLGTYQDVFVDDDANDTAYEFWRDRTRARIKDPVIAEKLAPTKKAYPFGVKRPSLEQTYYDIFNQDNVRVVDLHEDPIETITPTGLKTTSEQHEFDIIVYATGFDAVTGGLTAMDIRGT…	BVMO1 Rhodococcus jostii	N	24	4.06633	1.03215		20.4237	2.6034
>BVMO2	Baeyer-Villiger monooxygenase	Rhodococcus jostii RHA2	ro04304		MNLPQHVHTLIVGAGFAGMGLAARILQTQPQADVLIIERGDDVGGTWRDNTYPGCACDVPTSLYSYSFAPSADWSHTFARQPEIHRYLKKVAADTGVRSRVVTDCELQEAHWDADEAVWTVRTSRGTVTADVVVAATGALSTPSVPDMPGLETFGGTTFHSATWNHDHDLTGERVAVIGTGASAVQFVPEIAPVAEHLTVFQRTPAWVIPRLDRELSGSEKRLYRRLPLVQKAVRGTVYGFREALGGVLAHATGLLPVFEMVAKAHLRRQVRDPELRRKLTPNFTIGCKRMLLSNDWLRTLDRPDVTLVDAGLAGVTPDGVVDALGNEHKVDTIIFATGFTPTEPPVAHALRGANGRTLAEHWDGSPSAYKGTTVAGFPNLFLMYGPNTNLGHSSIVYM…	.	Y	30	2.34928	1.34435		36.3966
>BVMO3	Baeyer-Villiger monooxygenase	Rhodococcus jostii RHA3	ro03247		MNTTLLEELDVLVIGGGFSGVYQLDRLRTLGYNVKIYEAGTGLGGVWHWNSYPGARVDTWAPVYQFSREELWRDWNWSEMYPGRDELVRYFEYVDEKLDLSKDVRYETRVLAGRFDEETHRWTLVSRNERTGEEFTTQAQFVIMCLGAGSKPLFPNIPGLEKFGGDCFHTARWPLEGYDLAGKRVAVIGTGASGVQVIQEASKVADHLTVFQRTPNTALPMNQRALGEADNAEMKKTYPERFANRKNTWAGFDYDFLKENIQDLTEERRNEILEELWTNGGLQPWLGGFLNVLFDKDDNDILYAFWRDKTRQRITRPELVELLAPTEPIHPWGVKRVSLEQNYFESLCRDNVELVDTSANPIREVASDAIITADGTRHEVDVIVLATGFDSVTGGLTAI…	CRE2-BVMO3 Rhodococcus jostii	Y	17	4.16711	0.807114		16.1729	1.25872
>BVMO4	Baeyer-Villiger monooxygenase	Rhodococcus jostii RHA4	ro03063		MTAIHAPKNDLAQSAETPTYDVIVVGGGFGGIYQLRHLRDRGFSVILLEASGGFGGAWSLNRYPGARVDSHAPVYQFTDEYLWKDWDFSQMYPDHEEMRSYFNYVDSKLDLSKDSRFNTKVVGATFDEEQRMWSLETQDGATFRARFVVFATGSTTEPYTPSIPDMDAYQGELVHTARWRSDLDMTGKRVAIIGTGASAVQVVQEAGPVVENLTVFQRTPNISLPMQQKYLDDEEQAALKNKMPDVAAKCRETHAAIDYDFDPRSGFETPEDERNAVFERLWNQGGFAFWLGNFSDYLFNDKTNALTYEFWKNKIKPQIKDPVKAELLVPEIAPHPFGAKRPALHQNYYEVMNQTNVSLVSTKETPIVGFTETGIRTADGVEHGEFDIIVLATGFNNNT…	BVMO4 Rhodococcus jostii	N	24				100	no detectable substrate
>BVMO5	Baeyer-Villiger monooxygenase	Rhodococcus jostii RHA5	ro02109		MGGEVHRCRVLVIGTGFSGLGTAIQLRRRGRDDFILLEKAREVGGTWRENTYPGCACDVPSHLYSFSFEPNPDWTRMWSGQEEIFDYLRGLADKYDLRRNIHFGRTMTGGHWDAERRRWHVHTESGDEYVAQFVVSGIGALHIPNVPDLPGADTFDGTEFHSARWNHDYDLRGKKVAVIGTGASAVQFVPEIVGDVAELHLYQRTPPWVIPGLNFGIPPEARRLFGRVPLARRMVRAAVYWTYESLALGFNGHSRLMRPIESMARKNLNRTVADPELRRKLTPSYRIGCKRILGSDVYYPALISPKTVVITEGIAEVRPHSIVAGDGAERVVDAIIYATGFHVTDGFDNVELTGVGGRRLADEWEEHGIRTHLGITVAGYPNAFFLFGPNTGLGHNSVV…	.	Y	24	3.94527			0
>BVMO6	Baeyer-Villiger monooxygenase	Rhodococcus jostii RHA6	ro01874		MTHYDILIVGAGISGIGAAIRLKQSGIDNFAILEKGDALGGTWRDNTYPGCACDVPSALYSYSFAPNREWSRLFAGQDEIRRYIERTAAEHGVPAHVKFGTEMQRAQWSEQSRRWTVDTSAGTFTANAVIAAAGPWNEPLVPTVPGLDTFTGEVFHSSRWNHTYDLTGKRVAVVGTGASAVQFVPAIQPTVESLHLYQRTAQWVLPKPDHTLPGVERAILRRVPGAIRALRRVEYAIMESLGLGFRHPWILRVIQQVGKAQLRAQVRDPKLRKALTPDYTLGCKRLLLSNTYYPALTRPNVEVHANAVESVRGNVVVGSDGAEREVDAIIFGTGFHILDMPIGSKVFDGDGRSLDDHWKGSPQAYLGTTVAGFPNAFVLLGPALGTGHTSAFMILEAQL…	.	N	37	3.82829			0
>BVMO7	Baeyer-Villiger monooxygenase	Rhodococcus jostii RHA7	ro06008		MVSYMSLPVTDTSAPPAGVRHIDTLIIGSGFAGLGAAIKLTQAGKTDFLVLERGSDVGGTWRDNTYPGAACDVPSHLYSYSFALNPEWTRSFSTQPEIQKYIQSVADKYKVRNKHLFGCDVQSAHWNESTTRWEVTTTKGNFVAKVLVSAVGALCEPSLPDIKGIEGFEGEIFHSARWNHDADLTGKRVAVIGTGASAIQIVPAIGKKVSHLDVYQRTAPWILPRADREYTKLEHTAFKYLPGFQKLCRTGIYWMRESQVVGLAKAPVFMKPLQFAAERHLRRQIKDKALRKKVTPNFQIGCKRMLISNNYYPTLAQDNVDLVTDGIAEVTADSVVSKDGTVREVDAIVVATGFHVTDSPTFEGIFGKDGRSLADVFDEGGQQGYKGAAIANFPNMFFL…	.	Y	30	4.24228	0.0140827		0.330864
>BVMO8	Baeyer-Villiger monooxygenase	Rhodococcus jostii RHA8	ro08998/9		MDRGDTPHRREYSTPQGFCGDHRFRVLNSPNKTDIPGLDTFEGTVVHTAEWDPSLDLTGKRVVVVGTGCTAVQIVASIVDDVATVDAIVRSPHWIVPEKLWSTRYRPGRSGQCGTCRTSRIGSGSEPTGLPQNNLYMMPRIDPEWAATHLSVSPVNDLVMQTSLQYLEQTLPDRPDLREKLTPSIRPYAKRIVKDPGFLEALERDHVSLHRASPKHVHPGGVSLSSGEFVEADVIVLATGFKVEYASFIDITGRNGKKLADKWDHGQDPRAYLGIQVSGFPNLFVTAGPNAAPNHGAGHNITSEERVHYIVECLQYLVENDFSAMDVKPEALTVYNEKVDEALDQTVWAHPGEGVTGYYRNQQG	.	Y	24	3.38917	0.0526149		1.52871
>BVMO9	Baeyer-Villiger monooxygenase	Rhodococcus jostii RHA9	ro09035		MTVQDNDFDAVVVGAGISGLYAVYKLRQRGMRVHGFESAEGVGGTWYHNRYPGARCDVESIDYSYSFDEELQQEWTWTERFATQDEILRYLEHVADRHDLRSAYDFLTRVTSATYDEETTRWSITTDTGQNVTARFCVLATGVLSATNKPDIPGRDTFGGATYHTGEWPHEPVDFAGKRVGVIGTGSSGIQSIPVIAEEAAEVFVFQRSPNYSIPAGNRPLTGEYIAEVKANYAERRRLSRMSGGGTPNSAYPKGALEVDAEERRRVYDEWWQRGGYLFAKAFPDQTISQAANDTAREYVEAKIREMVTDPDIADQLVPTDHPIGTKRIVTDNGYFKTFNRGNVTLVNLRRTPITEITEAGVLTTNSFYGLDMLVFATGFDAMTGSLSRIDIRGRAGRN…	.	N	17	2.36671	0.059013		2.43281
>BVMO10	Baeyer-Villiger monooxygenase	Rhodococcus jostii RHA10	ro09039		MTETIAAGLAVPSDRDAQLYNAIAESDPAPLLMALVHATGDTGLLDEFGARLTIEEPGNHYRTGIRPTAPPGIYPEDVAEDIRIRAREILTPDVVAELGVPDDELFVRMATVCTSQRVDAEFAPILLEQAGFTKNRRHVPVTVAPPADFDVIVIGAGIVGINAGIKLGEAGFRYTIIEEREDVGGTWYRNTYPGAAVDTPSHYYSYSFELNPNWSKYYPTGPEYQNYLLDVVEKYRLREHIRFRTRVLSARWLDDEHRWEVVTEDGEGSVVRHRARAVITAMGMLNAANIPEVDGLDSFAGRVVHTAEWDSDLDLSGKRVVVLGTGCTSVQVVANIVDQVEALDVVVRSPHWLVPEKAVSGDVTEGEKWALANLPFYDRWFRLRSYWFASDNLYPLPRI…	.	N	24	3.98393	0.0174931		0.437172
>BVMO11	Baeyer-Villiger monooxygenase	Rhodococcus jostii RHA11	ro06698		MTTASIDTRELDEANGVLDVLVVGGGFAGLYQLDQLRSRGFSVKVVEAGDSLGGIWYWNCYPGARTDSTGQIYQYSREDLWKDWSYDELYPSWSGVRDYFAYVDRKLDLSRDIIFSTRVTSADFDGERNQWTVRTDTGRMLRARSVVICTGFGAKPHIPSINGLNSFAGESHHTALWPQEGLDMAGKRVGIIGTGSSGVQVTQEAAADAEQITIFQRTPNLALPMRQQQLTGQLKEKLKENLPERFAQRRRSFAGFDMDFIPKSVFEVSDEERADTYERMWATGGFELWLANYQDILLDERANRIMYDFWRDKVRQRVTDPVKAEKLAPMDPPHPFGTKRPSLEQNFYDVVNQENVDIVDVNEDPIERITPAGVQTKSGLHEFDILVFATGFDANRGGI…	BVMO11 Rhodococcus jostii	N	30	0	4.15058		100	no detectable substrate
>BVMO12	Baeyer-Villiger monooxygenase	Rhodococcus jostii RHA12	ro07112		MVRSAIPVELPVDSVDHPPEVVDVLVVGAGFGGLGTAIRLKQAGIDDFVVLDRAEDIGGTWRVNTYPGAQCDIPSILYSFSFAPNPNWTRLYPLQQEIHDYLRSCAENFGIVPHLRMGHDVQDAAWDDDSQVWHVTTSRGTWEARILVGAMGPFSEPAVPNLPALESFRGAVFHSAAWDHEHDLAGERVAVIGTGASAVQIIPRIQPIVGSMTVFQRTPTWILPHPDQPMTGWPRKLFARVPVAQRLARSGLDLVQEAMVPGFVYKPALLKGLAALGRAHLRRQVHDPELRTKLTPTYAFGCKRPTFSNSFYPALAQPNVDVITDGIREVRSNGIVTEDGVLHEVDTIVMGTGFRLTDNPAFDVVRGRDGRTLAEAWNGNARAYLGTTISGFPNFFMLL…	.	Y	30	4.06354	0.00484325		0.119046
>BVMO13	Baeyer-Villiger monooxygenase	Rhodococcus jostii RHA13	ro03773		MKHITTSHDSDQETPVTITTIPEVETMDFDVLIIGAGISGIGAAYHLKTRRPDTTFAILEGKDAIGGTWTQFRYPGIRSDSDMPTFGFGFKPWTHKKAIADAHIILDYLQETVTENHIDEHIRFGYRVSSAEFSSSAGRWTVTAQRSGSDETVQITARFLFSGTGYYNHEAGFTPEFDGIEDFTGQVVHPQHWPEELDYSGKKVVVIGSGATAATLIPAMAGTAAHITMLQRSPSYVLSLPAEDAIANTLNKLIGPKRAYPIIRRKNIMMHRGIFKACRRSPKLMRKLLIANARRQLPKNFDVDTHFTPRYNPWDQRLCMVPNGDLFKAISTGHASVVTDRIERFTATGIRLESGQELEADIVVTATGLNMLAFGAIQLSVDGEPVNPPDTTVYKSMML…	CRE2-BVMO13 Rhodococcus jostii	Y	24	2.5998	2.54238		49.4416	0.170792
>BVMO14	Baeyer-Villiger monooxygenase	Rhodococcus jostii RHA14	ro03437		MSKTISADVDVVVVGAGFAGLYALRKLRDTMKLSTRVFEAGSEVGGTWFWNRYPGARCDIESVHYSYSFDEDLQQEWQWSERFAGQPEILRYLEHVADRFDLRKDITFDTRVVGVHWDDENSVWTVRTDDGAVVRSRYFISGAGNLSVPKTPEFGGIDNFRGEVLLTGNWPREGADFTGKRVAVIGTGASGIQAIPFIAEDAAELVVFQRTPNFATPLGNGPMDPNELADIKSNYADVRTAARNHFLGVPFNQVQPSALAVDAEERRRTFDERWNAGGFRLFIDSYQDILFDKKANDTIADYIRDRIHERVQDPAKAATLAPTGYAYGTKRPPLETNYYEAFNRDSVSVVDVKSTPIDEITPTGVRVGDRVYEVDTIVLATGFDAMTGPLMAMDIRGRG…	BVMO14 Rhodococcus jostii	N	30	5.20758			0
>BVMO15	Baeyer-Villiger monooxygenase	Rhodococcus jostii RHA15	ro02492		MSARTEVDARANRIGDVDAVVVGAGFAGLYAVHKLRSLGLTVQGVEAAGGVGGTWFWNRYPGARCDVESVDYSYSFSRELEQEWDWSEKYATQPEILAYINHVADRFDLRDRFLFGTRVTSAELDEESLRWEVRTDRGDVLSARYCIFATGALSTANMPNIAGRESFTGDTHHTGQWPHEGVDFTGRRVGIIGTGSSGIQSIPLIAEQAEHLYVFQRSANYSVPAGNQAWDDEMRRAIKAGYEERRRLSRESGGGSPYNAHPKSALDVSDEERREAYETRWKLGGVLFAKTFPDQTKTEAANATAREFAEEKIRLLVDDPAVADKLIPNDHPIGTKRIVTDTHYFETYNRPNVTLVDLKAAPIESITPSGITTADADYALDTLVFATGFDAMTGALDRM…	.	N	24	3.60045	0.0769345		2.0921
>BVMO16	Baeyer-Villiger monooxygenase	Rhodococcus jostii RHA16	ro02919		MSHTETAAETTGAKTPVEHVDVLIIGAGLSGIGAAYHLQDNFPRRTYAILESRESIGGTWDLFRYPGIRSDSDMYTLGYRFKPWSGEKSIADGPSILEYVKDTAAEHGIDRNIRFRHKVVRAEWSTADSHWTVDAERTDTGETVRLTADFLMSCSGYYRYDEGYTPEFPGLDRFGGRVVHPQQWPEDLDYEGKRVVIIGSGATAVTLAPSMAADAAHVTMLQRSPTYIISMPAKDKLANKLRRHLPAKLAYGLTRLKNASVATAIYQLCQRYPEFMKGRIRQLQEKWLPKGYDIDTHFTPRYNPWDQRLCLVPNGDLFRAIRNDEVSIVTDHIDTFTETGITLKSGEELHADVVVTATGLNLLAFGGMTLAVDGHDIDLTETMAYKGMMLSGVPNFAFV…	CRE2-BVMO16 Rhodococcus jostii	Y	30	5.05424	0.0421966		0.84727
>BVMO17	Baeyer-Villiger monooxygenase	Rhodococcus jostii RHA17	ro05228		MTTGTTEPDVLVVGTGFAGLCMAIKLKEAGEENVVVLEKADRVGGTWRENTYPGCGCDVMSLMYSFSFAPNRKWTRMYARQPEILDYIERVVRDYDLAPHIRFGAEVISYEFDETTDRWRVETRSGSVYHPRIVVAGPGPLHKPSVPDLPGRKSFSGVAFHSAEWDHSVDLTGKRVAVVGTGASAVQFVPEVAKTAAHVDVFQRTPHWILPKLDRPITAGEKAVFKAVPGVQKAYRGAIYWSHESLIAGFLHPRLMTVLESAARGLLRRQVRDPELRATLTPDYIIGCKRILVSSNFYPALQRGNVDLVTSGISEVTERGIRTDDGTMHEADVIVYGTGFAAGDRFENEHIVGRRGLTIQRAWRDGMEAYLGVAVAGFPNFFLMMGPNSGGGNQSIVFV…	.	Y	24	3.89184	0.00723044		0.18544
>BVMO18	Baeyer-Villiger monooxygenase	Rhodococcus jostii RHA18	ro05396		MKAAQQVQEAGAATDDRINPDRLTESEIRTAVARANVPSLLMVVFQTTGDEKWLAAPYRPTRGKGLGDHDSGGLEEPIQDEIREAAVKAILDLQNGALPAVETPSPELTVRMISVCTGEEVGEEYGPMLSLELARRAAPDAPSLALEPVDAPEGYSVVVIGTGVAGIAAAQQLEDMGIDYVILEKQPEAGGNWWQNTYPGAGVDTPSHLYSFSFAKNDWTTHFELRNELQAYFGAVLKDLGAGERVRYGTEVRSTRYDEAAAQWSVDMINPDGSSSTLRADVVISAVGVLNRPKTPNVPGMDSFTGTSFHSAAWPDDLDLDGKRVAIVGTGASSMQIAPAIADRVAHLSIYQRSPQWVAPFEKFRAPIPMELRRLMQTCPIYHSWYWIRLFWQFGDKVI…	.	Y	30	3.75207	0.003899		0.103808
>BVMO19	Baeyer-Villiger monooxygenase	Rhodococcus jostii RHA19	ro05522		MTATTTQHAAAPDGGGDERHLRVVVVGAGLSGIAAAVKLERAGITDFVVLEKSDRVGGVWRENTYPGCGVDIPAPVYSFSFHPNPRWRSNFALQPELLSYIEDTVDTFGLQSRISMQTDVREAAWSDERRRWILDTSRGTIVAQHVIFAAGPITEPSTPAVPGIDRFDGDVFHSARWNHDVDLTGKRVAVVGTGASAVQFIPEIQPDVEELYVFQRTPAWVVPRLDFPFPRIAQWAFARVPAVQRALRRLLDVILRTLTWVMRCERTARLLNPIGTRWLARQVPDPALRAALTPNFTLGCKRLLLSNTYLPALTKSNVELIPHALAEVDGRVVVGADGTRREVDVIIFGTGFDVSHPPIASRIRGRDGTLLSEKWSKSPEAYLATTTPGAPNAYIMLGP…	.	Y	24	3.8427	0.00480522		0.124892
>BVMO20	Baeyer-Villiger monooxygenase	Rhodococcus jostii RHA20	ro08137		MTASQADTATRTGKHSNNDVLDVLIIGGGFSGLYALDRIRDLGFTAKVWDAAGGLGGIWWWNCYPGARTDSTGQIYQFSHKDLWKKYDFAELYPGHDGVRNYFEYVDSQLDLTRDVVFDTFAESCTWDEETRQWTARSADGKVQNARQVIVATGFGAKPLYPNLEGLDLFAGDCYHTARWPQEGVDMTGRKVVVMGTGSSGVQVVQEAGHVAEHVTVFQRTPNLAIPMQQRALTHDDNEQFRKGLPERFEARYKAFAGFDFDFLPQNAADLSMEERDAIYEKMWAEGGFEMWLGNFQDILVDEDANRTFYDFWRNKVLERVTDPKKAAIVAPETPPHPYGVKRPSLEQDYFDVINQSNVEVIDSNLTPIRRVLPHGIETDDGVIECDLLVLATGFDNNS…	BVMO20 Rhodococcus jostii	N	17	1.12796	3.68753		76.0076	6.8555
>BVMO21	Baeyer-Villiger monooxygenase	Rhodococcus jostii RHA21	ro10187		MSTTASAPTETSATESLELDALIIGAGVAGLYQLHQLREQGLRVRAYDTAGDVGGTWYWNRYPGARFDSEAYIYQYLFSEELYKNWSWSQRFPGQPEIERWMHYVADTLDLRRDIQLSTMITSAHYDERADKWIVRTDRGETITTRFLVTCSGMLSAPMSYVFEGQEEFSGPIFHTSRWPKEGADLDGKRVAVIGVGATGIQVIQTVADKVEHLKVFIRTPQYALPMKNPTFDESDVAAYKSRFAELKETLPNTFSGFEYDFEHVWADLTPEQRNDVLEEIYENGSLKLWLASFGEMFYDEEISEEISEFVRRKMRARLQDPHLCDLLIPTDYGFGTHRVPLETNYLETYHRPNVEAIGVRDNPITRIVPQGLVLADGTLHEVDVIVMATGFDAGTGSL…	BVMO21 Rhodococcus jostii	N	17	2.72302	1.89811		41.114	6.32064
>BVMO24	Baeyer-Villiger monooxygenase	Rhodococcus jostii RHA24	ro05323		MTTSMKAANPMNFPSTSDTGIVDVLGVGAGFSGLYLSHRLTTAGWTFAGFEAGPSVGGTWFWNTYPGARCDVESIYYSYSFDEALQQEWTWSQRFAPQAEILSYINHVADRFDLRKHFTFNTRVVGATWNAAERLWEVQLDNGETRRGRYLISGAGGLSTPKDFDVPGLGNFTGLQVSTSRWNISLDDLAGKRVAVIGTGSSGVQAIPLIAEVAEHVTVFQRTPNYVMPARNAELPLERVDSIKDDYPAIREECRHSPGGIPDRPVTDKAFDVSAEERQRRYEAAYERSGFNGVGGEFADLLTDVEANRTASEFIHDKIREIVEDPATAELLVPRYHPLGAKRSVFGTDYYETYNRPNVSLVSLRDEPIETMTANAIVTSKGTYEADAVVLAIGFDAFT…	.	N	24	3.51612	0.0861754		2.39224
>BVMO Af1	Baeyer-Villiger monooxygenase	Aspergillus fumigatus Af293	XP_755274.1	GI:71001186	MRCIPCPDEGFLHIHGIPVVQRPLQVGDRKTNISVRVPVLDSDPPSSSPPLSKVHTSTMSEHYLDALVVGTGFSGIYALQSLLKLNLKVKAIDAASDVGGTWYWSRYPGAMSDSWSHLYRYSFDYEYPLYRRYVSQPEMLAYLRHVVEKYDLRGHMQFNTDMTSAVWDEGTSTWRVSCKTGDVFHVRYLLTALGLLTKANYPDLPGLQTFRGEIRHTSAWDTDLDLKGKRVGLVGVGSSGVQLVPAVADTVQSLHVFIRRPQFCVPSGDRALTAEEREAIFRDFPQIWSEARTSRVAIGFPELSREAMALCPADREAAFERLWEAGSGLQFLFGGFTDLLTDPVANEEACKFIRRKIKAIVKDPQKRKVLTPDEPYARRPLCANGFYEQFNRDNVFAVD…	.	Y	24	3.69446			0
							[but]	[mepro]	stdev	[etac]	[prod]	%mepro	stdev
							1	0.0550456	0.00667136	0.346378	0.401424	13.6876	0.793993
							5	0.223046	0.00980694	0.817741	1.04079	21.4255	0.21712
							10	0.311565	0.0128517	0.892766	1.20433	25.8653	0.197092
							25	0.384054	0.0155902	0.830118	1.21417	31.6301	0.243162
							50	0.410372	0.0107142	0.792033	1.2024	34.1265	0.22224
							75	0.402806	0.0348152	0.742392	1.1452	35.1604	0.301381
							100	0.391386	0.0163133	0.703956	1.09534	35.7239	0.297793
							200	0.3825	0.00990466	0.654279	1.03678	36.8952	0.204033
							500	0.356266	0.0133705	0.594055	0.950321	37.4872	0.187477
							1000	0.318397	0.0063299	0.519742	0.838139	37.9888	0.114506
